# Supplementary material for: Use of Artificial Intelligence for Predicting Parameters of Sustainable Concrete and Raw Ingredient Effects and Interactions
Source: MDPI journal article supplement (doi:10.3390/ma15155207), 2022-07-27
Supplement: s1 [file s1]

**Table S1.** Database for recycled aggregate concrete used in modeling.

| Ref. | Water<br>(kg/m <sup>3</sup> ) | Cement<br>(kg/m <sup>3</sup> ) | Sand<br>(kg/m <sup>3</sup> ) | NCA<br>(kg/m <sup>3</sup> ) | RCA<br>(kg/m <sup>3</sup> ) | SP<br>(kg/m <sup>3</sup> ) | $D_{max\_RCA}$<br>(mm) | $\rho_{RCA}$<br>(kg/m <sup>3</sup> ) | $W_{RCA}$<br>(%) | UCS<br>(MPa) |
|------|-------------------------------|--------------------------------|------------------------------|-----------------------------|-----------------------------|----------------------------|------------------------|--------------------------------------|------------------|--------------|
| [1]  | 165                           | 370                            | 650                          | 850.5                       | 364.5                       | 2.22                       | 20                     | 2400                                 | 4.9              | 50.6         |
|      | 165                           | 370                            | 650                          | 607.5                       | 607.5                       | 2.22                       | 20                     | 2400                                 | 4.9              | 50.8         |
|      | 165                           | 370                            | 650                          | 0                           | 1215                        | 2.22                       | 20                     | 2400                                 | 4.9              | 50.2         |
|      | 165                           | 460                            | 575                          | 850.5                       | 364.5                       | 2.22                       | 20                     | 2400                                 | 4.9              | 60.8         |
|      | 165                           | 460                            | 575                          | 607.5                       | 607.5                       | 2.22                       | 20                     | 2400                                 | 4.9              | 61.2         |
|      | 165                           | 460                            | 575                          | 0                           | 1215                        | 2.22                       | 20                     | 2400                                 | 4.9              | 60.2         |
|      | 165                           | 560                            | 495                          | 850.5                       | 364.5                       | 2.59                       | 20                     | 2400                                 | 4.9              | 70.2         |
|      | 165                           | 560                            | 495                          | 607.5                       | 607.5                       | 2.59                       | 20                     | 2400                                 | 4.9              | 70.8         |
|      | 165                           | 560                            | 495                          | 0                           | 1215                        | 2.59                       | 20                     | 2400                                 | 4.9              | 70           |
| [2]  | 207.6                         | 400                            | 662                          | 863                         | 153                         | 0                          | 20                     | 2410                                 | 5.8              | 38.1         |
|      | 207.6                         | 400                            | 662                          | 697                         | 298                         | 0                          | 20                     | 2410                                 | 5.8              | 37           |
|      | 207.6                         | 400                            | 662                          | 383                         | 573                         | 0                          | 20                     | 2410                                 | 5.8              | 35.8         |
|      | 207.6                         | 400                            | 662                          | 0                           | 903                         | 0                          | 20                     | 2410                                 | 5.8              | 34.5         |
| [3]  | 217                           | 353                            | 660                          | 861                         | 209                         | 0                          | 20                     | 2330                                 | 6.3              | 44.9         |
|      | 229                           | 353                            | 647                          | 527                         | 513                         | 0                          | 20                     | 2330                                 | 6.3              | 44.7         |
|      | 241                           | 353                            | 625                          | 0                           | 993                         | 0                          | 20                     | 2330                                 | 6.3              | 46.8         |
|      | 230                           | 353                            | 661                          | 853                         | 202                         | 0                          | 20                     | 2330                                 | 6.3              | 43.2         |
|      | 247                           | 353                            | 647                          | 524                         | 496                         | 0                          | 20                     | 2330                                 | 6.3              | 39.7         |
|      | 271                           | 353                            | 625                          | 0                           | 959                         | 0                          | 20                     | 2330                                 | 6.3              | 43.3         |
|      | 206                           | 353                            | 661                          | 864                         | 216                         | 0                          | 20                     | 2330                                 | 6.3              | 43           |

|     |       |     |     |      |      |       |    |      |     |      |
|-----|-------|-----|-----|------|------|-------|----|------|-----|------|
|     | 207   | 353 | 649 | 531  | 531  | 0     | 20 | 2330 | 6.3 | 38.1 |
| [4] | 165   | 300 | 765 | 905  | 267  | 4.98  | 25 | 2430 | 4.4 | 42   |
|     | 165   | 318 | 739 | 608  | 537  | 6.042 | 25 | 2430 | 4.4 | 41   |
|     | 162   | 325 | 683 | 0    | 1123 | 6.175 | 25 | 2430 | 4.4 | 40   |
| [5] | 160.6 | 380 | 598 | 1182 | 52   | 4.9   | 20 | 2165 | 6.8 | 62.2 |
|     | 165.4 | 380 | 529 | 1175 | 103  | 4.9   | 20 | 2165 | 6.8 | 58.4 |
|     | 170.2 | 380 | 460 | 1168 | 154  | 4.9   | 20 | 2165 | 6.8 | 61.3 |
|     | 175.6 | 380 | 327 | 1162 | 254  | 4.9   | 20 | 2165 | 6.8 | 60.8 |
|     | 180.9 | 380 | 0   | 1162 | 509  | 4.9   | 20 | 2165 | 6.8 | 61   |
| [6] | 225   | 410 | 642 | 840  | 204  | 0     | 20 | 2570 | 3.5 | 45.3 |
|     | 225   | 410 | 642 | 524  | 506  | 0     | 20 | 2570 | 3.5 | 42.5 |
|     | 225   | 410 | 642 | 210  | 814  | 0     | 20 | 2570 | 3.5 | 39.2 |
|     | 225   | 410 | 642 | 0    | 1017 | 0     | 20 | 2570 | 3.5 | 37.1 |
| [7] | 180   | 400 | 708 | 886  | 215  | 0     | 20 | 2570 | 3.5 | 62.4 |
|     | 180   | 400 | 708 | 554  | 538  | 0     | 20 | 2570 | 3.5 | 55.8 |
|     | 180   | 400 | 708 | 0    | 1075 | 0     | 20 | 2570 | 3.5 | 42   |
|     | 225   | 410 | 642 | 840  | 204  | 0     | 20 | 2570 | 3.5 | 45.3 |
|     | 225   | 410 | 642 | 524  | 506  | 0     | 20 | 2570 | 3.5 | 42.5 |
|     | 225   | 410 | 642 | 0    | 1017 | 0     | 20 | 2570 | 3.5 | 38.1 |
| [8] | 234   | 360 | 705 | 0    | 1100 | 0     | 19 | 2390 | 4.4 | 22.1 |
|     | 190   | 380 | 705 | 0    | 1100 | 0     | 19 | 2390 | 4.4 | 25.1 |
|     | 192   | 400 | 705 | 0    | 1100 | 0     | 19 | 2390 | 4.4 | 27.2 |
|     | 181   | 420 | 705 | 0    | 1100 | 0     | 19 | 2390 | 4.4 | 28.7 |
|     | 184   | 460 | 705 | 0    | 1100 | 0     | 19 | 2390 | 4.4 | 29.5 |
| [9] | 178   | 264 | 835 | 0    | 1030 | 0     | 30 | 2520 | 3.8 | 18   |

|      |     |     |        |        |        |      |    |      |     |      |
|------|-----|-----|--------|--------|--------|------|----|------|-----|------|
|      | 174 | 262 | 830    | 0      | 1020   | 0    | 30 | 2510 | 3.9 | 15.4 |
|      | 148 | 427 | 760    | 0      | 1000   | 4.2  | 30 | 2520 | 3.8 | 36.4 |
|      | 153 | 423 | 755    | 0      | 990    | 4.1  | 30 | 2510 | 3.9 | 35.7 |
|      | 152 | 443 | 855    | 0      | 885    | 3.9  | 30 | 2520 | 3.8 | 44.4 |
| [10] | 225 | 410 | 642    | 840    | 204    | 0    | 20 | 2580 | 3.5 | 45.3 |
|      | 225 | 410 | 642    | 524    | 506    | 0    | 20 | 2580 | 3.5 | 42.5 |
|      | 225 | 410 | 642    | 0      | 1017   | 0    | 20 | 2580 | 3.5 | 38.1 |
|      | 205 | 410 | 662    | 865    | 210    | 0    | 20 | 2580 | 3.5 | 51.7 |
|      | 205 | 410 | 662    | 541    | 525    | 0    | 20 | 2580 | 3.5 | 47.1 |
|      | 205 | 410 | 662    | 0      | 1049   | 0    | 20 | 2580 | 3.5 | 43.4 |
|      | 180 | 400 | 708    | 886    | 215    | 5.6  | 20 | 2580 | 3.5 | 62.4 |
|      | 180 | 400 | 708    | 554    | 538    | 5.6  | 20 | 2580 | 3.5 | 56.8 |
|      | 180 | 400 | 708    | 0      | 1075   | 5.6  | 20 | 2580 | 3.5 | 52.1 |
|      | 160 | 400 | 729    | 912    | 221    | 7.8  | 20 | 2580 | 3.5 | 69.6 |
|      | 160 | 400 | 729    | 570    | 554    | 7.8  | 20 | 2580 | 3.5 | 65.3 |
|      | 160 | 400 | 729    | 0      | 1107   | 7.8  | 20 | 2580 | 3.5 | 58.5 |
| [11] | 175 | 350 | 730    | 711    | 297    | 1.68 | 25 | 2530 | 1.9 | 36.7 |
|      | 175 | 350 | 730    | 508    | 494    | 1.68 | 25 | 2530 | 1.9 | 38   |
|      | 175 | 350 | 730    | 0      | 989    | 1.68 | 25 | 2530 | 1.9 | 36   |
|      | 175 | 350 | 730    | 508    | 469    | 1.68 | 25 | 2400 | 6.2 | 30.4 |
|      | 175 | 350 | 730    | 0      | 938    | 1.68 | 25 | 2400 | 6.2 | 29.5 |
| [12] | 190 | 380 | 744.45 | 756.97 | 189.24 | 2.66 | 20 | 2338 | 5.2 | 47.4 |
|      | 190 | 380 | 709.54 | 471.13 | 471.12 | 2.66 | 20 | 2338 | 5.2 | 47.3 |
|      | 190 | 380 | 714.56 | 0      | 874.04 | 5.32 | 20 | 2338 | 5.2 | 54.8 |
|      | 140 | 350 | 732    | 519    | 556    | 4.2  | 12 | 2420 | 6.8 | 43.3 |

|      |       |     |         |        |        |         |    |      |     |      |
|------|-------|-----|---------|--------|--------|---------|----|------|-----|------|
| [13] | 153   | 340 | 723     | 512    | 549    | 3.4     | 12 | 2400 | 6.8 | 39.6 |
|      | 165   | 330 | 715     | 507    | 543    | 2.64    | 12 | 2400 | 6.8 | 38.1 |
|      | 176   | 320 | 708     | 502    | 537    | 1.92    | 12 | 2400 | 6.8 | 34.5 |
|      | 186   | 310 | 702     | 497    | 533    | 1.24    | 12 | 2400 | 6.8 | 31.6 |
|      | 140   | 350 | 732     | 553    | 523    | 4.2     | 22 | 2420 | 8.8 | 46.1 |
|      | 153   | 340 | 723     | 547    | 517    | 3.4     | 22 | 2420 | 8.8 | 45.8 |
|      | 165   | 330 | 715     | 541    | 511    | 2.64    | 22 | 2420 | 8.8 | 39.9 |
|      | 176   | 320 | 708     | 535    | 506    | 1.92    | 22 | 2420 | 8.8 | 36.3 |
|      | 186   | 310 | 702     | 531    | 501    | 1.24    | 22 | 2420 | 8.8 | 34.7 |
| [14] | 200   | 270 | 750     | 675    | 200    | 1.08    | 19 | 2440 | 5.8 | 18.5 |
|      | 210   | 270 | 750     | 450    | 400    | 1.35    | 19 | 2440 | 5.8 | 18.0 |
|      | 220   | 270 | 750     | 225    | 600    | 1.62    | 19 | 2440 | 5.8 | 16.5 |
|      | 165   | 370 | 865     | 760    | 230    | 1.48    | 19 | 2440 | 5.8 | 33.0 |
|      | 165   | 370 | 865     | 505    | 455    | 1.85    | 19 | 2440 | 5.8 | 34.5 |
|      | 165   | 370 | 865     | 250    | 680    | 2.59    | 19 | 2440 | 5.8 | 34.0 |
| [15] | 178.5 | 275 | 938.05  | 723.07 | 180.77 | 1.925   | 16 | 2400 | 5   | 31.7 |
|      | 178.5 | 275 | 962.73  | 423.77 | 423.77 | 1.925   | 16 | 2400 | 5   | 32.4 |
|      | 178.5 | 275 | 1005.18 | 0      | 756.46 | 1.925   | 16 | 2400 | 5   | 30.1 |
|      | 190   | 380 | 794.31  | 750.04 | 187.57 | 2.66    | 16 | 2400 | 5   | 43.7 |
|      | 190   | 380 | 811.37  | 443.71 | 443.71 | 2.66    | 16 | 2400 | 5   | 37.5 |
|      | 190   | 380 | 838.29  | 0      | 807.97 | 2.66    | 16 | 2400 | 5   | 40.5 |
| [15] | 151   | 335 | 630     | 414    | 720    | 1.266   | 19 | 2420 | 5.4 | 41.4 |
|      | 156   | 349 | 888     | 0      | 792    | 1.67616 | 19 | 2420 | 5.4 | 43.9 |
|      | 161   | 358 | 645     | 281    | 813    | 1.3584  | 19 | 2500 | 3.3 | 44.8 |
|      | 156   | 349 | 857     | 0      | 867    | 1.2564  | 19 | 2500 | 3.3 | 45.9 |

|      |        |     |     |         |        |         |    |      |     |      |
|------|--------|-----|-----|---------|--------|---------|----|------|-----|------|
| [16] | 172.43 | 401 | 574 | 911     | 303    | 0.2005  | 20 | 2661 | 1.9 | 47   |
|      | 172.43 | 401 | 574 | 585     | 585    | 0.70175 | 20 | 2602 | 2.6 | 46   |
|      | 172.43 | 401 | 574 | 0       | 1119   | 0.90225 | 20 | 2510 | 3.9 | 42.5 |
| [17] | 190.8  | 424 | 770 | 0       | 980    | 0       | 19 | 2490 | 4.8 | 41   |
|      | 192.5  | 350 | 800 | 0       | 1015   | 0       | 19 | 2490 | 4.8 | 33.3 |
|      | 191.75 | 295 | 814 | 0       | 1039   | 0       | 19 | 2490 | 4.8 | 24.8 |
| [18] | 175    | 325 | 0   | 0       | 1762   | 3.45    | 32 | 2263 | 6   | 33.2 |
|      | 222    | 350 | 0   | 0       | 1778   | 4.5     | 32 | 2283 | 4.2 | 35.6 |
|      | 221    | 350 | 0   | 0       | 1771   | 4.5     | 32 | 2292 | 4.3 | 34.6 |
|      | 195    | 325 | 0   | 0       | 1710   | 3.25    | 32 | 2301 | 5   | 37.3 |
|      | 123    | 300 | 0   | 192     | 1728   | 3       | 32 | 2609 | 1.5 | 45.4 |
|      | 144    | 325 | 0   | 768     | 1152   | 3.25    | 32 | 2518 | 2.7 | 54.3 |
|      | 123    | 325 | 0   | 754.4   | 1131.6 | 3.25    | 32 | 2584 | 1.6 | 54.4 |
|      | 132    | 300 | 0   | 1448.25 | 482.75 | 3       | 32 | 2594 | 1.6 | 53.4 |
| [19] | 180    | 275 | 625 | 882     | 378    | 0       | 20 | 2340 | 5.3 | 20.0 |
|      | 180    | 295 | 595 | 635     | 635    | 0       | 20 | 2340 | 5.3 | 19.0 |
|      | 180    | 310 | 610 | 0       | 1240   | 0       | 20 | 2340 | 5.3 | 18.0 |
|      | 180    | 330 | 585 | 872     | 373    | 0       | 20 | 2340 | 5.3 | 23.0 |
|      | 180    | 355 | 560 | 623     | 623    | 0       | 20 | 2340 | 5.3 | 24.0 |
|      | 180    | 372 | 536 | 0       | 1252   | 0       | 20 | 2340 | 5.3 | 21   |
|      | 180    | 355 | 560 | 872     | 373    | 0       | 20 | 2340 | 5.3 | 25.0 |
|      | 180    | 385 | 550 | 613     | 613    | 0       | 20 | 2340 | 5.3 | 29.0 |
|      | 180    | 409 | 525 | 0       | 1226   | 0       | 20 | 2340 | 5.3 | 30   |
|      | 180    | 375 | 544 | 869     | 372    | 0       | 20 | 2340 | 5.3 | 39   |

|      |     |     |     |      |      |      |    |      |      |      |
|------|-----|-----|-----|------|------|------|----|------|------|------|
|      | 180 | 405 | 508 | 624  | 624  | 0    | 20 | 2340 | 5.3  | 31.0 |
|      | 180 | 426 | 494 | 0    | 1241 | 0    | 20 | 2340 | 5.3  | 34   |
| [20] | 193 | 350 | 661 | 1061 | 57   | 0    | 12 | 2010 | 10.9 | 40   |
|      | 194 | 350 | 515 | 1061 | 170  | 0    | 12 | 2010 | 10.9 | 38.6 |
|      | 196 | 350 | 368 | 1061 | 283  | 0    | 12 | 2010 | 10.9 | 37.6 |
|      | 199 | 158 | 0   | 1061 | 566  | 0    | 12 | 2010 | 10.9 | 38.6 |
|      | 158 | 350 | 693 | 1111 | 59   | 3.5  | 12 | 2010 | 10.9 | 53.7 |
|      | 163 | 350 | 536 | 1105 | 177  | 3.5  | 12 | 2010 | 10.9 | 51   |
|      | 168 | 350 | 381 | 1100 | 294  | 3.5  | 12 | 2010 | 10.9 | 47.8 |
|      | 178 | 350 | 0   | 1089 | 582  | 3.5  | 12 | 2010 | 10.9 | 45.1 |
|      | 137 | 350 | 713 | 1143 | 61   | 3.5  | 12 | 2010 | 10.9 | 64.6 |
|      | 139 | 350 | 555 | 1143 | 183  | 3.5  | 12 | 2010 | 10.9 | 65.4 |
|      | 143 | 350 | 395 | 1138 | 304  | 3.5  | 12 | 2010 | 10.9 | 63.2 |
|      | 150 | 350 | 0   | 1132 | 605  | 3.5  | 12 | 2010 | 10.9 | 63.0 |
| [21] | 180 | 281 | 802 | 0    | 970  | 0    | 10 | 2360 | 4.7  | 38.6 |
|      | 170 | 293 | 648 | 0    | 919  | 0    | 10 | 2280 | 6.2  | 38.1 |
|      | 165 | 337 | 841 | 0    | 879  | 0    | 10 | 2220 | 7.8  | 39.3 |
|      | 190 | 463 | 621 | 0    | 970  | 0    | 10 | 2360 | 4.7  | 60.1 |
|      | 190 | 500 | 621 | 0    | 919  | 3.24 | 10 | 2280 | 6.2  | 60.2 |
|      | 180 | 600 | 567 | 0    | 879  | 5.04 | 10 | 2220 | 7.8  | 62.8 |
|      | 220 | 537 | 693 | 782  | 138  | 0    | 20 | 2330 | 4.4  | 50.8 |
| [22] | 220 | 537 | 693 | 644  | 276  | 0    | 20 | 2330 | 4.4  | 44.9 |
|      | 220 | 537 | 693 | 506  | 414  | 0    | 20 | 2330 | 4.4  | 44.6 |
|      | 220 | 537 | 693 | 368  | 552  | 0    | 20 | 2330 | 4.4  | 42.4 |
|      | 220 | 537 | 693 | 782  | 138  | 0    | 20 | 2370 | 4    | 54   |

|     |     |     |     |     |   |    |      |     |      |
|-----|-----|-----|-----|-----|---|----|------|-----|------|
| 220 | 537 | 693 | 644 | 276 | 0 | 20 | 2370 | 4   | 56   |
| 220 | 537 | 693 | 506 | 414 | 0 | 20 | 2370 | 4   | 54.4 |
| 220 | 537 | 693 | 368 | 552 | 0 | 20 | 2370 | 4   | 40.6 |
| 220 | 537 | 693 | 782 | 138 | 0 | 20 | 2390 | 3.6 | 55.2 |
| 220 | 537 | 693 | 644 | 276 | 0 | 20 | 2390 | 3.6 | 53.5 |
| 220 | 537 | 693 | 506 | 414 | 0 | 20 | 2390 | 3.6 | 56.9 |
| 220 | 537 | 693 | 368 | 552 | 0 | 20 | 2390 | 3.6 | 54.7 |
| 220 | 537 | 693 | 782 | 138 | 0 | 20 | 2320 | 4.6 | 50.5 |
| 220 | 537 | 693 | 644 | 276 | 0 | 20 | 2320 | 4.6 | 48.9 |
| 220 | 537 | 693 | 506 | 414 | 0 | 20 | 2320 | 4.6 | 45.8 |
| 220 | 537 | 693 | 368 | 552 | 0 | 20 | 2320 | 4.6 | 40   |
| 220 | 537 | 693 | 782 | 138 | 0 | 20 | 2390 | 3.7 | 54.4 |
| 220 | 537 | 693 | 644 | 276 | 0 | 20 | 2390 | 3.7 | 50.2 |
| 220 | 537 | 693 | 506 | 414 | 0 | 20 | 2390 | 3.7 | 49.5 |
| 220 | 537 | 693 | 368 | 552 | 0 | 20 | 2390 | 3.7 | 40.4 |
| 220 | 537 | 693 | 782 | 138 | 0 | 20 | 2390 | 3.5 | 45   |
| 220 | 537 | 693 | 644 | 276 | 0 | 20 | 2390 | 3.5 | 46.9 |
| 220 | 537 | 693 | 506 | 414 | 0 | 20 | 2390 | 3.5 | 51.4 |
| 220 | 537 | 693 | 368 | 552 | 0 | 20 | 2390 | 3.5 | 53.2 |
| 220 | 537 | 693 | 782 | 138 | 0 | 20 | 2380 | 3.8 | 55.3 |
| 220 | 537 | 693 | 644 | 276 | 0 | 20 | 2380 | 3.8 | 55.9 |
| 220 | 537 | 693 | 506 | 414 | 0 | 20 | 2380 | 3.8 | 52.6 |
| 220 | 537 | 693 | 368 | 552 | 0 | 20 | 2380 | 3.8 | 48   |
| 220 | 537 | 693 | 782 | 138 | 0 | 20 | 2380 | 3.8 | 49.1 |

|      |       |     |       |     |      |   |    |      |     |      |
|------|-------|-----|-------|-----|------|---|----|------|-----|------|
|      | 220   | 537 | 693   | 644 | 276  | 0 | 20 | 2380 | 3.8 | 49.9 |
|      | 220   | 537 | 693   | 506 | 414  | 0 | 20 | 2380 | 3.8 | 50.3 |
|      | 220   | 537 | 693   | 368 | 552  | 0 | 20 | 2380 | 3.8 | 47.5 |
|      | 220   | 537 | 693   | 782 | 138  | 0 | 20 | 2400 | 3.5 | 43.2 |
|      | 220   | 537 | 693   | 644 | 276  | 0 | 20 | 2400 | 3.5 | 53.7 |
|      | 220   | 537 | 693   | 506 | 414  | 0 | 20 | 2400 | 3.5 | 50   |
|      | 220   | 537 | 693   | 368 | 552  | 0 | 20 | 2400 | 3.5 | 43.3 |
|      | 220   | 537 | 693   | 782 | 138  | 0 | 20 | 2370 | 4   | 52.9 |
|      | 220   | 537 | 693   | 644 | 276  | 0 | 20 | 2370 | 4   | 49.9 |
|      | 220   | 537 | 693   | 506 | 414  | 0 | 20 | 2370 | 4   | 53.7 |
|      | 220   | 537 | 693   | 368 | 552  | 0 | 20 | 2370 | 4   | 46   |
| [23] | 206   | 413 | 606   | 0   | 987  | 0 | 25 | 2452 | 4.1 | 51   |
|      | 206   | 413 | 606   | 0   | 987  | 0 | 25 | 2452 | 4.1 | 49   |
|      | 206   | 413 | 606   | 0   | 987  | 0 | 25 | 2452 | 4.1 | 48   |
|      | 206   | 413 | 606   | 537 | 494  | 0 | 25 | 2452 | 4.1 | 51   |
|      | 206   | 413 | 606   | 537 | 494  | 0 | 25 | 2452 | 4.1 | 51   |
|      | 206   | 413 | 606   | 537 | 494  | 0 | 25 | 2452 | 4.1 | 51   |
|      | 206   | 413 | 606   | 805 | 245  | 0 | 25 | 2452 | 4.1 | 52   |
|      | 206   | 413 | 606   | 805 | 245  | 0 | 25 | 2452 | 4.1 | 50   |
|      | 206   | 413 | 606   | 805 | 245  | 0 | 25 | 2452 | 4.1 | 49   |
| [24] | 145.6 | 520 | 577.2 | 0   | 1040 | 0 | 25 | 2260 | 7.5 | 38.3 |
|      | 145.6 | 520 | 577.2 | 0   | 1040 | 0 | 25 | 2260 | 7.5 | 32.9 |
|      | 119.6 | 520 | 577.2 | 0   | 1040 | 0 | 25 | 2260 | 7.5 | 33.2 |
|      | 146.2 | 430 | 653.6 | 0   | 1032 | 0 | 25 | 2260 | 7.5 | 31.3 |



|      |        |     |        |     |        |   |    |      |     |      |
|------|--------|-----|--------|-----|--------|---|----|------|-----|------|
|      | 146.2  | 430 | 653.6  | 0   | 1032   | 0 | 25 | 2260 | 7.5 | 28.4 |
|      | 120.4  | 430 | 653.6  | 0   | 1032   | 0 | 25 | 2260 | 7.5 | 28.0 |
|      | 145.77 | 339 | 728.85 | 0   | 1050.9 | 0 | 25 | 2260 | 7.5 | 26.5 |
|      | 145.77 | 339 | 728.85 | 0   | 1050.9 | 0 | 25 | 2260 | 7.5 | 23.3 |
|      | 118.65 | 339 | 728.85 | 0   | 1050.9 | 0 | 25 | 2260 | 7.5 | 21.6 |
|      | 144.06 | 294 | 767.34 | 0   | 1029   | 0 | 25 | 2260 | 7.5 | 21.6 |
|      | 144.06 | 294 | 767.34 | 0   | 1029   | 0 | 25 | 2260 | 7.5 | 18.0 |
|      | 117.6  | 294 | 767.34 | 0   | 1029   | 0 | 25 | 2260 | 7.5 | 18.8 |
|      | 146.91 | 249 | 804.27 | 0   | 1045.8 | 0 | 25 | 2260 | 7.5 | 16.1 |
|      | 146.91 | 249 | 804.27 | 0   | 1045.8 | 0 | 25 | 2260 | 7.5 | 13.4 |
|      | 119.52 | 249 | 804.27 | 0   | 1045.8 | 0 | 25 | 2260 | 7.5 | 13.9 |
| [25] | 179    | 275 | 878    | 735 | 184    | 0 | 20 | 2320 | 5.3 | 41   |
|      | 179    | 275 | 849    | 455 | 455    | 0 | 20 | 2320 | 5.3 | 44   |
|      | 179    | 275 | 868    | 0   | 830    | 0 | 20 | 2320 | 5.3 | 45   |
|      | 190    | 380 | 744    | 757 | 189    | 0 | 20 | 2320 | 5.3 | 50.5 |
|      | 190    | 380 | 710    | 471 | 471    | 0 | 20 | 2320 | 5.3 | 45   |
|      | 190    | 380 | 715    | 0   | 874    | 0 | 20 | 2320 | 5.3 | 56   |
|      | 179    | 275 | 961    | 740 | 185    | 0 | 20 | 2320 | 5.3 | 33.5 |
|      | 179    | 275 | 978    | 408 | 408    | 0 | 20 | 2320 | 5.3 | 32   |
|      | 179    | 275 | 1010   | 0   | 640    | 0 | 20 | 2320 | 5.3 | 32   |
|      | 190    | 380 | 813    | 767 | 192    | 0 | 20 | 2320 | 5.3 | 44   |
|      | 190    | 380 | 822    | 426 | 427    | 0 | 20 | 2320 | 5.3 | 41   |
|      | 190    | 380 | 836    | 0   | 683    | 0 | 20 | 2320 | 5.3 | 41.5 |
|      | 179    | 325 | 799    | 839 | 210    | 0 | 20 | 2320 | 5.3 | 44   |
|      | 179    | 325 | 831    | 490 | 490    | 0 | 20 | 2320 | 5.3 | 41   |

[26]

|       |     |       |       |       |      |    |      |     |      |
|-------|-----|-------|-------|-------|------|----|------|-----|------|
| 179   | 325 | 825   | 0     | 923   | 0    | 20 | 2320 | 5.3 | 33.5 |
| 173   | 385 | 698   | 892   | 223   | 0    | 20 | 2320 | 5.3 | 53.5 |
| 173   | 385 | 742   | 515   | 515   | 0    | 20 | 2320 | 5.3 | 54   |
| 173   | 385 | 746   | 0     | 963   | 0    | 20 | 2320 | 5.3 | 40   |
| 159.6 | 380 | 862.4 | 489.3 | 489.3 | 5.7  | 20 | 2330 | 6.1 | 41.6 |
| 193.8 | 380 | 934.1 | 0     | 867.7 | 6.46 | 20 | 2330 | 6.1 | 31.4 |
| 197.6 | 380 | 862.4 | 489.3 | 489.3 | 5.7  | 20 | 2330 | 6.1 | 35.5 |
| 231.8 | 380 | 934.1 | 0     | 867.7 | 6.46 | 20 | 2330 | 6.1 | 26   |
| 167.2 | 380 | 862.4 | 489.3 | 489.3 | 5.7  | 20 | 2320 | 5.8 | 44.6 |
| 193.8 | 380 | 934.1 | 0     | 867.7 | 6.46 | 20 | 2320 | 5.8 | 36.7 |
| 235.6 | 380 | 934.1 | 0     | 867.7 | 6.46 | 20 | 2320 | 5.8 | 29.5 |
| 155.8 | 380 | 818.5 | 840.9 | 210.2 | 4.56 | 20 | 2360 | 3.9 | 46.1 |
| 159.6 | 380 | 862.4 | 489.3 | 489.3 | 5.7  | 20 | 2360 | 3.9 | 45.1 |
| 171   | 380 | 934.1 | 0     | 867.7 | 6.46 | 20 | 2360 | 3.9 | 42.9 |
| 190   | 380 | 818.5 | 840.9 | 210.2 | 4.56 | 20 | 2360 | 3.9 | 39.3 |
| 197.6 | 380 | 862.4 | 489.3 | 489.3 | 5.7  | 20 | 2360 | 3.9 | 39.5 |
| 205.2 | 380 | 934.1 | 0     | 867.7 | 6.46 | 20 | 2360 | 3.9 | 37.7 |
| 159.6 | 380 | 818.5 | 840.9 | 210.2 | 4.56 | 20 | 2350 | 4.5 | 48.1 |
| 163.4 | 380 | 862.4 | 489.3 | 489.3 | 5.7  | 20 | 2350 | 4.5 | 41   |
| 152   | 380 | 934.1 | 0     | 867.7 | 6.46 | 20 | 2350 | 4.5 | 38.7 |
| 193.8 | 380 | 818.5 | 840.9 | 210.2 | 4.56 | 20 | 2350 | 4.5 | 42.7 |
| 197.6 | 380 | 862.4 | 489.3 | 489.3 | 5.7  | 20 | 2350 | 4.5 | 35.4 |
| 190   | 380 | 934.1 | 0     | 867.7 | 6.46 | 20 | 2350 | 4.5 | 31.4 |
| 159.6 | 380 | 818.5 | 840.9 | 210.2 | 4.56 | 20 | 2350 | 4.7 | 48.5 |

|      |       |     |       |       |       |        |    |      |     |      |
|------|-------|-----|-------|-------|-------|--------|----|------|-----|------|
|      | 159.6 | 380 | 862.4 | 489.3 | 489.3 | 5.7    | 20 | 2350 | 4.7 | 45.4 |
|      | 163.4 | 380 | 934.1 | 0     | 867.7 | 6.46   | 20 | 2350 | 4.7 | 37   |
|      | 197.6 | 380 | 818.5 | 840.9 | 210.2 | 4.56   | 20 | 2350 | 4.7 | 41.3 |
|      | 197.6 | 380 | 862.4 | 489.3 | 489.3 | 5.7    | 20 | 2350 | 4.7 | 36.8 |
|      | 212.8 | 380 | 934.1 | 0     | 867.7 | 6.46   | 20 | 2350 | 4.7 | 31.2 |
| [27] | 159.8 | 340 | 556   | 1020  | 238   | 0      | 20 | 2336 | 3.6 | 50   |
|      | 159.8 | 340 | 556   | 638   | 596   | 0      | 20 | 2315 | 3.6 | 45.3 |
|      | 159.8 | 340 | 556   | 319   | 894   | 0      | 20 | 2295 | 3.6 | 44   |
| [28] | 185.4 | 309 | 864   | 848   | 211   | 1.0197 | 16 | 2380 | 6.9 | 42.9 |
|      | 191.7 | 320 | 817.5 | 538   | 538   | 1.056  | 16 | 2380 | 6.9 | 42.5 |
|      | 201.6 | 336 | 785   | 0     | 1060  | 1.1088 | 16 | 2380 | 6.9 | 40.9 |
|      | 192.5 | 386 | 829   | 808   | 202   | 2.0458 | 16 | 2380 | 6.9 | 51.6 |
|      | 200   | 399 | 795   | 504   | 504   | 2.1147 | 16 | 2380 | 6.9 | 51.6 |
|      | 210   | 420 | 738   | 0     | 1014  | 2.226  | 16 | 2380 | 6.9 | 50.3 |
| [29] | 205   | 300 | 697   | 0     | 1075  | 0      | 20 | 2450 | 3.1 | 35   |
|      | 205   | 300 | 697   | 0     | 1027  | 0      | 20 | 2370 | 7.1 | 29.2 |
|      | 205   | 300 | 697   | 0     | 1027  | 0      | 20 | 2360 | 7.8 | 27.7 |
|      | 180   | 350 | 706   | 0     | 1089  | 0      | 20 | 2450 | 3.1 | 47.6 |
|      | 180   | 350 | 706   | 0     | 1041  | 0      | 20 | 2370 | 7.1 | 42   |
|      | 180   | 350 | 706   | 0     | 1041  | 0      | 20 | 2360 | 7.8 | 42.9 |
|      | 185   | 425 | 696   | 0     | 1028  | 0      | 20 | 2450 | 3.1 | 60   |
|      | 185   | 425 | 696   | 0     | 982   | 0      | 20 | 2370 | 7.1 | 53.7 |
|      | 185   | 425 | 696   | 0     | 982   | 0      | 20 | 2360 | 7.8 | 53.2 |
|      | 165   | 485 | 685   | 0     | 1039  | 0      | 20 | 2450 | 3.1 | 78.2 |
|      | 165   | 485 | 685   | 0     | 979   | 0      | 20 | 2370 | 7.1 | 71.2 |

|      |       |     |       |       |       |     |    |      |     |      |
|------|-------|-----|-------|-------|-------|-----|----|------|-----|------|
|      | 165   | 485 | 685   | 0     | 982   | 0   | 20 | 2360 | 7.8 | 65.4 |
| [30] | 178.3 | 358 | 730.4 | 783.6 | 299.3 | 0.3 | 19 | 2570 | 2.7 | 33.6 |
|      | 178.3 | 358 | 730.4 | 458.3 | 598.4 | 0.3 | 19 | 2570 | 2.7 | 30.4 |
|      | 178.3 | 358 | 730.4 | 0     | 1020  | 0.3 | 19 | 2570 | 2.7 | 29.1 |
| [31] | 195   | 300 | 787.1 | 756.4 | 189.1 | 0   | 20 | 2300 | 5.2 | 39.5 |
|      | 195   | 300 | 737.4 | 485.5 | 485.5 | 0   | 20 | 2300 | 5.2 | 40.8 |
|      | 195   | 300 | 712.6 | 0     | 951.4 | 0   | 20 | 2300 | 5.2 | 43.7 |
|      | 195   | 300 | 814.4 | 733   | 183.2 | 0   | 20 | 2300 | 5.5 | 41   |
|      | 195   | 300 | 804.2 | 450.7 | 450.7 | 0   | 20 | 2300 | 5.5 | 38.8 |
|      | 195   | 300 | 807.9 | 0     | 855.2 | 0   | 20 | 2300 | 5.5 | 39.9 |
| [32] | 214.2 | 210 | 929   | 0     | 966   | 0   | 22 | 2451 | 7.8 | 19.7 |
|      | 196   | 280 | 866   | 0     | 940   | 0   | 22 | 2387 | 6.9 | 35.7 |
|      | 161   | 350 | 858   | 0     | 974   | 3.5 | 22 | 2362 | 4.2 | 66.8 |
|      | 212.1 | 210 | 932   | 0     | 970   | 0   | 22 | 2456 | 7.5 | 21.8 |
|      | 193.2 | 280 | 870   | 0     | 970   | 0   | 22 | 2455 | 6.4 | 36.1 |
|      | 157.5 | 350 | 858   | 0     | 1029  | 3.5 | 22 | 2496 | 4.2 | 68.5 |
|      | 207.9 | 210 | 938   | 0     | 953   | 0   | 22 | 2401 | 7.6 | 21   |
|      | 187.6 | 280 | 877   | 0     | 988   | 0   | 22 | 2484 | 5.4 | 41.1 |
|      | 150.5 | 350 | 868   | 0     | 982   | 3.5 | 22 | 2363 | 3.6 | 70.2 |
|      | 205.8 | 210 | 943   | 0     | 977   | 0   | 22 | 2447 | 6.9 | 23.6 |
|      | 190.4 | 280 | 873   | 0     | 962   | 0   | 22 | 2458 | 5.8 | 39.7 |
|      | 157.5 | 350 | 858   | 0     | 1016  | 3.5 | 22 | 2464 | 3.9 | 66.5 |
| [33] | 179   | 275 | 878   | 735   | 184   | 0   | 19 | 2320 | 5.3 | 49.3 |
|      | 179   | 275 | 849   | 455   | 455   | 0   | 19 | 2320 | 5.3 | 47.5 |
|      | 179   | 275 | 868   | 0     | 830   | 0   | 19 | 2320 | 5.3 | 53.7 |

|     |     |      |     |     |   |    |      |     |      |
|-----|-----|------|-----|-----|---|----|------|-----|------|
| 190 | 380 | 714  | 757 | 189 | 0 | 19 | 2320 | 5.3 | 64.8 |
| 190 | 380 | 710  | 471 | 471 | 0 | 19 | 2320 | 5.3 | 63.5 |
| 190 | 380 | 715  | 0   | 874 | 0 | 19 | 2320 | 5.3 | 65.1 |
| 179 | 275 | 961  | 740 | 185 | 0 | 19 | 2320 | 5.3 | 64.8 |
| 179 | 275 | 978  | 408 | 408 | 0 | 19 | 2320 | 5.3 | 63.5 |
| 179 | 275 | 1010 | 0   | 640 | 0 | 19 | 2320 | 5.3 | 65.1 |
| 190 | 380 | 813  | 767 | 192 | 0 | 19 | 2320 | 5.3 | 54.9 |
| 190 | 380 | 822  | 426 | 427 | 0 | 19 | 2320 | 5.3 | 51.5 |
| 190 | 380 | 836  | 0   | 683 | 0 | 19 | 2320 | 5.3 | 50.3 |
| 179 | 325 | 799  | 839 | 210 | 0 | 19 | 2320 | 5.3 | 56.5 |
| 179 | 325 | 831  | 490 | 490 | 0 | 19 | 2320 | 5.3 | 48.9 |
| 179 | 325 | 825  | 0   | 923 | 0 | 19 | 2320 | 5.3 | 43.1 |
| 173 | 385 | 698  | 892 | 233 | 0 | 19 | 2320 | 5.3 | 67.4 |
| 173 | 385 | 742  | 515 | 515 | 0 | 19 | 2320 | 5.3 | 61.2 |
| 173 | 385 | 746  | 0   | 963 | 0 | 19 | 2320 | 5.3 | 53.7 |

## References

1. Limbachiya, M.C.; Leelawat, T.; Dhir, R.K. Use of recycled concrete aggregate in high-strength concrete. *Mater. Struct.* **2000**, *33*, 574–580, <https://doi.org/10.1007/bf02480538>.
2. Gómez-Soberón, J.M.V. Porosity of recycled concrete with substitution of recycled concrete aggregate: An experimental study. *Cem. Concr. Res.* **2002**, *32*, 1301–1311, [https://doi.org/10.1016/s0008-8846\(02\)00795-0](https://doi.org/10.1016/s0008-8846(02)00795-0).
3. Poon, C.S.; Shui, Z.H.; Lam, L.; Fok, H.; Kou, S.C. Influence of moisture states of natural and recycled aggregates on the slump and compressive strength of concrete. *Cem. Concr. Res.* **2004**, *34*, 31–36, [https://doi.org/10.1016/s0008-8846\(03\)00186-8](https://doi.org/10.1016/s0008-8846(03)00186-8).
4. Etxeberria, M.; Mari, A.; Vázquez, E. Recycled aggregate concrete as structural material. *Mater. Struct.* **2006**, *40*, 529–541, <https://doi.org/10.1617/s11527-006-9161-5>.

5. Evangelista, L.; de Brito, J. Mechanical behaviour of concrete made with fine recycled concrete aggregates. *Cem. Concr. Compos.* **2007**, *29*, 397–401, <https://doi.org/10.1016/j.cemconcomp.2006.12.004>.
6. Poon, C.S.; Kou, S.C.; Lam, L. Influence of recycled aggregate on slump and bleeding of fresh concrete. *Mater. Struct.* **2006**, *40*, 981–988, <https://doi.org/10.1617/s11527-006-9192-y>.
7. Kou, S.C.; Poon, C.S.; Chan, D. Influence of Fly Ash as Cement Replacement on the Properties of Recycled Aggregate Concrete. *J. Mater. Civ. Eng.* **2007**, *19*, 709–717, [https://doi.org/10.1061/\(asce\)0899-1561\(2007\)19:9\(709\)](https://doi.org/10.1061/(asce)0899-1561(2007)19:9(709)).
8. Rahal, K. Mechanical properties of concrete with recycled coarse aggregate. *Build. Environ.* **2007**, *42*, 407–415, <https://doi.org/10.1016/j.buildenv.2005.07.033>.
9. Casuccio, M.; Torrijos, M.; Giaccio, G.; Zerbino, R. Failure mechanism of recycled aggregate concrete. *Constr. Build. Mater.* **2008**, *22*, 1500–1506, <https://doi.org/10.1016/j.conbuildmat.2007.03.032>.
10. Kou, S.C.; Poon, C.S.; Chan, D. Influence of fly ash as a cement addition on the hardened properties of recycled aggregate concrete. *Mater. Struct.* **2007**, *41*, 1191–1201, <https://doi.org/10.1617/s11527-007-9317-y>.
11. Yang, K.-H.; Chung, H.-S.; Ashour, A.F. Influence of Type and Replacement Level of Recycled Aggregates on Concrete Properties. *ACI Mater. J.* **2008**, *105*, 289–296.
12. Domingo-Cabo, A.; Lázaro, C.; López-Gayarre, F.; Serrano-López, M.A.; Serna, P.; Castaño-Tabares, J.O. Creep and shrinkage of recycled aggregate concrete. *Constr. Build. Mater.* **2009**, *23*, 2545–2553, doi:10.1016/j.conbuildmat.2009.02.018.
13. Corinaldesi, V. Mechanical and elastic behaviour of concretes made of recycled-concrete coarse aggregates. *Constr. Build. Mater.* **2010**, *24*, 1616–1620, <https://doi.org/10.1016/j.conbuildmat.2010.02.031>.
14. Zega, C.J.; Di Maio, A. Recycled Concretes Made with Waste Ready-Mix Concrete as Coarse Aggregate. *J. Mater. Civ. Eng.* **2011**, *23*, 281–286, [https://doi.org/10.1061/\(asce\)mt.1943-5533.0000165](https://doi.org/10.1061/(asce)mt.1943-5533.0000165).
15. Fathifazl, G.; Razaqpur, A.G.; Isgor, O.B.; Abbas, A.; Fournier, B.; Foo, S. Creep and drying shrinkage characteristics of concrete produced with coarse recycled concrete aggregate. *Cem. Concr. Compos.* **2011**, *33*, 1026–1037, <https://doi.org/10.1016/j.cemconcomp.2011.08.004>.
16. Rao, M.C.; Bhattacharyya, S.K.; Barai, S.V. Influence of field recycled coarse aggregate on properties of concrete. *Mater. Struct.* **2010**, *44*, 205–220, <https://doi.org/10.1617/s11527-010-9620-x>.
17. Somna, R.; Jaturapitakkul, C.; Chalee, W.; Rattanachu, P. Effect of the Water to Binder Ratio and Ground Fly Ash on Properties of Recycled Aggregate Concrete. *J. Mater. Civ. Eng.* **2012**, *24*, 16–22, [https://doi.org/10.1061/\(asce\)mt.1943-5533.0000360](https://doi.org/10.1061/(asce)mt.1943-5533.0000360).
18. Hoffmann, C.; Schubert, S.; Leemann, A.; Motavalli, M. Recycled concrete and mixed rubble as aggregates: Influence of variations in composition on the concrete properties and their use as structural material. *Constr. Build. Mater.* **2012**, *35*, 701–709, <https://doi.org/10.1016/j.conbuildmat.2011.10.007>.
19. Limbachiya, M.; Meddah, M.S.; Ouchagour, Y. Performance of Portland/Silica Fume Cement Concrete Produced with Recycled Concrete Aggregate. *ACI Mater. J.* **2012**, *109*, 91–.
20. Pereira, P.; Evangelista, L.; de Brito, J. The effect of superplasticizers on the mechanical performance of concrete made with fine recycled concrete aggregates. *Cem. Concr. Compos.* **2012**, *34*, 1044–1052, <https://doi.org/10.1016/j.cemconcomp.2012.06.009>.
21. Butler, L.; West, J.S.; Tighe, S.L. Effect of recycled concrete coarse aggregate from multiple sources on the hardened properties of concrete with equivalent compressive strength. *Constr. Build. Mater.* **2013**, *47*, 1292–1301, <https://doi.org/10.1016/j.conbuildmat.2013.05.074>.
22. Ismail, S.; Ramli, M. Engineering properties of treated recycled concrete aggregate (RCA) for structural applications. *Constr. Build. Mater.* **2013**, *44*, 464–476, <https://doi.org/10.1016/j.conbuildmat.2013.03.014>.
23. Matias, D.; de Brito, J.; Rosa, A.; Pedro, D. Mechanical properties of concrete produced with recycled coarse aggregates – Influence of the use of superplasticizers. *Constr. Build. Mater.* **2013**, *44*, 101–109, <https://doi.org/10.1016/j.conbuildmat.2013.03.011>.

24. Sheen, Y.-N.; Wang, H.-Y.; Juang, Y.-P.; Le, D.-H. Assessment on the engineering properties of ready-mixed concrete using recycled aggregates. *Constr. Build. Mater.* **2013**, *45*, 298–305, <https://doi.org/10.1016/j.conbuildmat.2013.03.072>.
25. Thomas, C.; Setién, J.; Polanco, J.; Alaejos, P.; de Juan, M.S. Durability of recycled aggregate concrete. *Constr. Build. Mater.* **2013**, *40*, 1054–1065, <https://doi.org/10.1016/j.conbuildmat.2012.11.106>.
26. Ulloa, V.A.; García-Taengua, E.; Pelufo, M.-J.; Domingo, A.; Serna, P. New views on effect of recycled aggregates on concrete compressive strength. *ACI Mater. J.* **2013**, *110*, 1–10.
27. Younis, K.H.; Pilakoutas, K. Strength prediction model and methods for improving recycled aggregate concrete. *Constr. Build. Mater.* **2013**, *49*, 688–701.
28. Beltrán, M.G.; Barbudo, A.; Agrela, F.; Galvín, A.P.; Jiménez, J.R. Effect of cement addition on the properties of recycled concretes to reach control concretes strengths. *J. Clean. Prod.* **2014**, *79*, 124–133, <https://doi.org/10.1016/j.jclepro.2014.05.053>.
29. Duan, Z.; Poon, C.S. Properties of recycled aggregate concrete made with recycled aggregates with different amounts of old adhered mortars. *Mater. Des.* **2014**, *58*, 19–29, <https://doi.org/10.1016/j.matdes.2014.01.044>.
30. Folino, P.; Xargay, H. Recycled aggregate concrete – Mechanical behavior under uniaxial and triaxial compression. *Constr. Build. Mater.* **2014**, *56*, 21–31, <https://doi.org/10.1016/j.conbuildmat.2014.01.073>.
31. Gayarre, F.L.; Pérez, C.L.-C.; López, M.A.S.; Cabo, A.D. The effect of curing conditions on the compressive strength of recycled aggregate concrete. *Constr. Build. Mater.* **2014**, *53*, 260–266, <https://doi.org/10.1016/j.conbuildmat.2013.11.112>.
32. Pedro, D.; de Brito, J.; Evangelista, L. Performance of concrete made with aggregates recycled from precasting industry waste: influence of the crushing process. *Mater. Struct.* **2014**, *48*, 3965–3978, <https://doi.org/10.1617/s11527-014-0456-7>.
33. Thomas, C.; Sosa, I.; Setién, J.; Polanco, J.A.; Cimentada, A.I. Evaluation of the fatigue behavior of recycled aggregate concrete. *J. Clean. Prod.* **2014**, *65*, 397–405, <https://doi.org/10.1016/j.jclepro.2013.09.036>.
